# Supplementary material for: ANALYSIS OF A CIRCULAR WAVEGUIDE CAVITY LOADED WITH THICK MAGNETIZED FERRITE DISKS
Source: Springer Nature journal article supplement (doi:10.1038/s41562-021-01056-1), 1977-04-01
Supplement: 41562_2021_1056_MOESM1_ESM.pdf [file 41562_2021_1056_MOESM1_ESM.pdf]

登录


欢迎来到顺通转运！
微信汇率：1円 ≈ 0.052344元
支付宝汇率：1円 ≈ 0.052702元

- 运输渠道 

  :   服务收费
  :   顺通CC包税线
- 顺通商城 

  :   日本商城
  :   国内商城
- 二手代拍 

  :   雅虎竞拍
  :   煤炉代买
  :   雅虎二手
  :   乐天二手
- 新品代拍 

  :   日本亚马逊
  :   乐天新品
  :   ZOZOTOWN
- 代购代拍 

  :   雅虎代拍
      实体店代购
- 线上代拍
- 帮助中心 

  :   CC线教程手机版
      使用教程
      CC线教程电脑版

欢迎登录顺通转运


记住密码，以后自动登录

登录

没有账号？ 免费注册
